# Supplementary material
Source: PubMed Central journal article supplement (PMC6051758)
Supplement: NIHMS981399-supplement-Supplement.pdf [file NIHMS981399-supplement-Supplement.pdf]

**Engineered charge redistribution of Gp2 proteins through guided diversity for improved PET imaging of epidermal growth factor receptor**

Brett A. Case, Max A. Kruziki, Sadie M. Johnson, and Benjamin J. Hackel\*

University of Minnesota – Twin Cities, Department of Chemical Engineering and Materials Science, 421 Washington Avenue SE, Minneapolis, MN 55455

\* Correspondence: 421 Washington Avenue SE, Minneapolis, MN 55455, [hackel@umn.edu](mailto:hackel@umn.edu), 612.624.7102

| Library | Pre-sorting Population | Post-sorting Population | T (°C) | Target (nM)          | Parental Clone      |                     |
|---------|------------------------|-------------------------|--------|----------------------|---------------------|---------------------|
|         |                        |                         |        |                      | T <sub>m</sub> (°C) | K <sub>D</sub> (nM) |
| EGFR    | Naïve                  | #1                      | 60     | 20                   | 71 ± 2              | 18 ± 8              |
|         | #1                     | #2a                     | 60     | 2                    |                     |                     |
|         | #1                     | #2b                     | 80     | 20                   |                     |                     |
|         | #2(a+b)                | #3                      | 80     | 2                    |                     |                     |
|         | #3                     | Final                   | 4      | deplete non-specific |                     |                     |
| InsR    | Naïve                  | #1                      | 50     | 20                   | 78                  | 2.4 ± 0.4           |
|         | #1                     | #2a                     | 50     | 2                    |                     |                     |
|         | #1                     | #2b                     | 60     | 20                   |                     |                     |
|         | #2(a+b)                | Final                   | 4      | deplete non-specific |                     |                     |
| rlgG    | Naïve                  | #1                      | 50     | 2                    | 80 ± 2              | 2.3 ± 1.4           |
|         | #1                     | #2                      | 60     | 2                    |                     |                     |
|         | #2                     | Final                   | 4      | deplete non-specific |                     |                     |

**Table S1.** Library sorting conditions for charge mutated Gp2 libraries with parental clone *in vitro* characteristics.

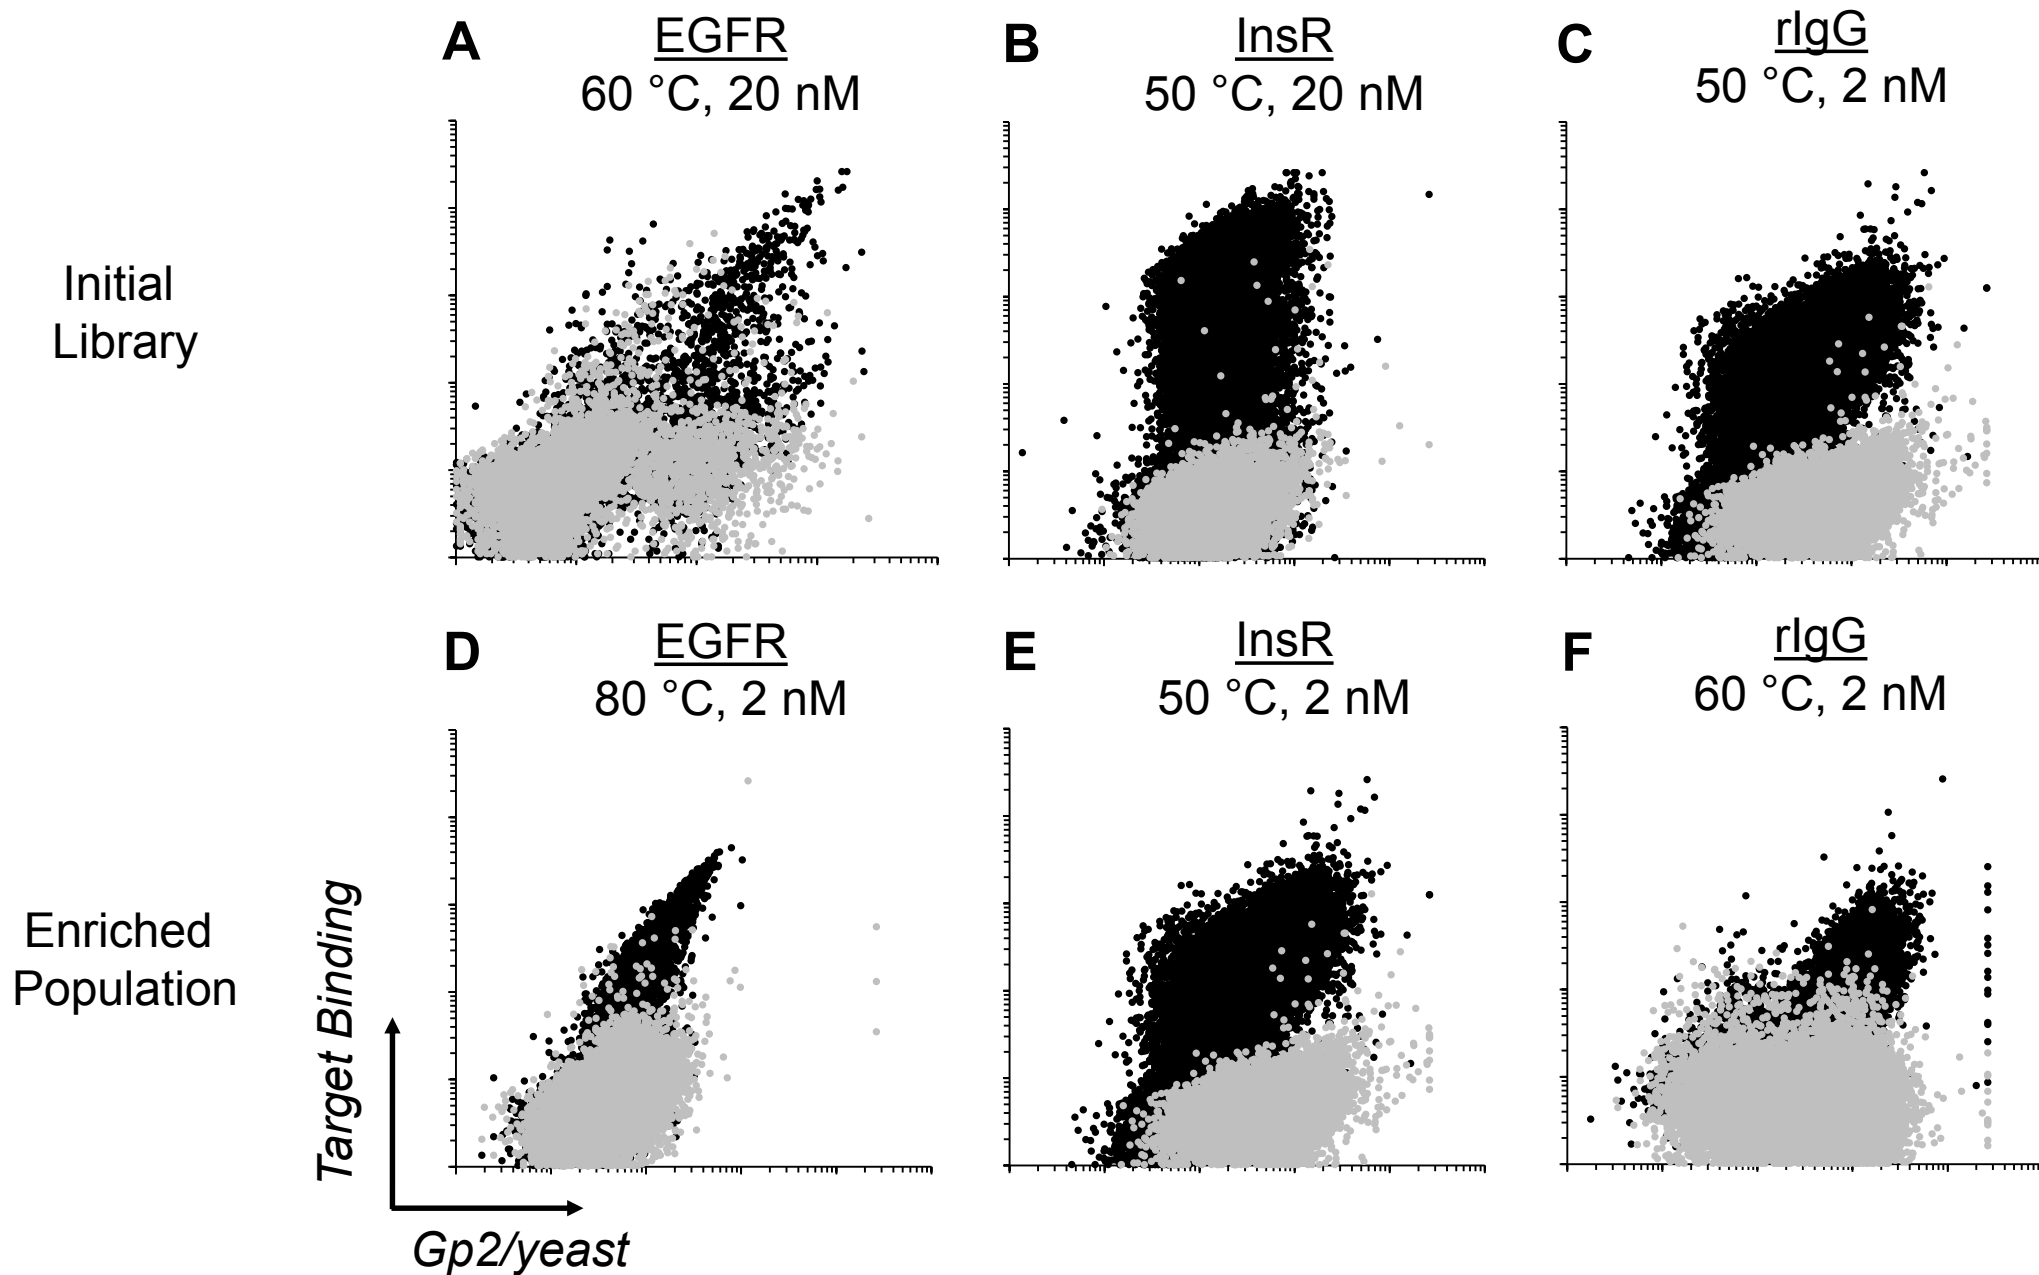

**Figure S1.** First Generation Library Selections. Naïve (**A, B, C**) and terminal (**D, E, F**) GαE, GαI, and GαR populations sorted for stability and binding with (black) and without (gray) their respective recombinant target.

| Name   | 1 | 14 | 20 | 23 | 24 | 27 | 30 | 31 | 42 | 44 | Loop 1  | Loop 2   | Charge (+/-) | Net Charge | Total Charge | $T_m$ (°C) | $K_D$ (nM)    | Yield (mg/L)  |
|--------|---|----|----|----|----|----|----|----|----|----|---------|----------|--------------|------------|--------------|------------|---------------|---------------|
| GαE22  | L | E  | T  | Y  | A  | L  | H  | S  | R  | P  | SRGDSYW | PMYWHIYY | 2/2          | 0          | 4            | 60         | $6.3 \pm 1.4$ | $1.8 \pm 0.4$ |
| GαE24  | L | E  | Q  | D  | T  | V  | E  | W  | R  | Q  | SRGDSYW | PMYWHIYY | 2/4          | -2         | 6            | ND         | ND            | < 50          |
| GαE25A | L | E  | P  | D  | A  | E  | E  | T  | R  | P  | SRGDSYW | PMYWHIYY | 2/5          | -3         | 7            | 64         | $4.9 \pm 0.7$ | $1.8 \pm 1.2$ |
| GαE25B | I | E  | E  | D  | P  | Q  | E  | R  | Q  | P  | SRGDSYW | PMYWHIYY | 2/5          | -3         | 7            | ND         | ND            | < 50          |
| GαE35  | L | E  | Q  | D  | E  | K  | E  | T  | R  | P  | SRGDSYW | PMYWHIYY | 3/5          | -2         | 8            | $87 \pm 1$ | $8.8 \pm 0.6$ | $2.1 \pm 0.5$ |
| GαE36  | K | E  | E  | D  | E  | Q  | E  | W  | R  | Q  | SRGDSYW | PMYWHIYY | 3/6          | -3         | 9            | 59         | $2.3 \pm 1.1$ | $5.0 \pm 0.3$ |
| GαE57  | K | E  | E  | D  | E  | E  | E  | R  | R  | R  | SRGDSYW | PMYWHIYY | 5/7          | -2         | 12           | 79         | $9.4 \pm 4.1$ | $2.7 \pm 0.1$ |

**Table S2.** Mutated positions, paratope (loop) sequences, and *in vitro* characteristics of Gp2 clones recovered in flow cytometry sorts against EGFR derived from A431 cell lysate.  $K_D$  values represent equilibrium dissociation constants from titrations of mutants against A431 cells using flow cytometry (n = 3). Midpoint denaturation temperatures ( $T_m$ ) were determined with circular dichroism spectroscopy of purified proteins (n = 1 - 3). Yield is reported as recovered mass of purified protein per L of culture (n = 3).



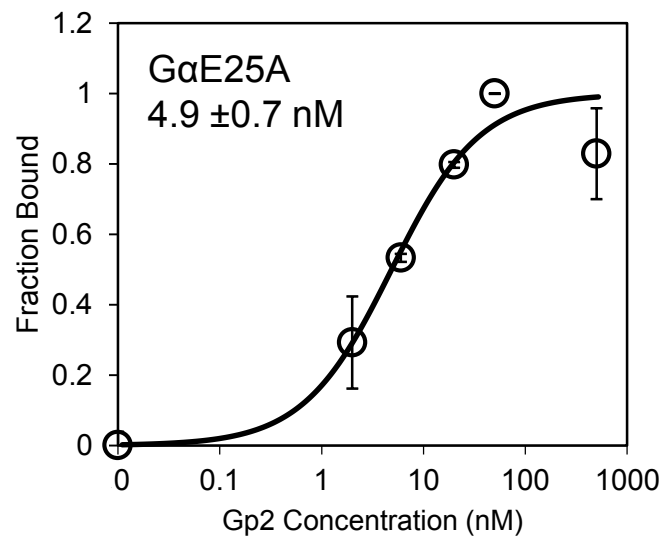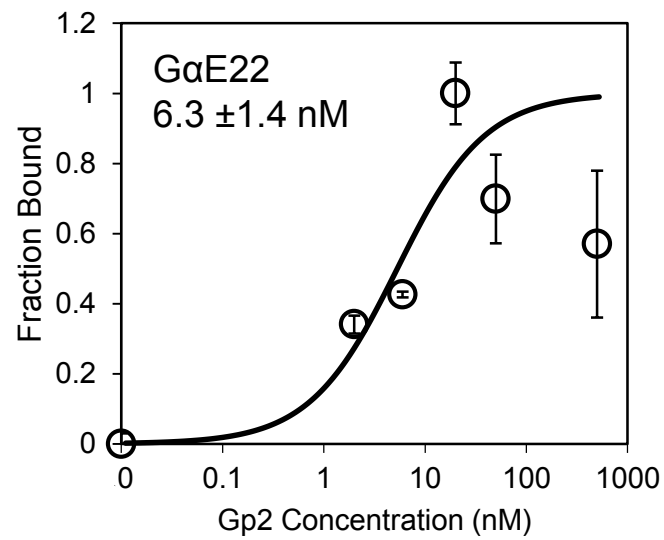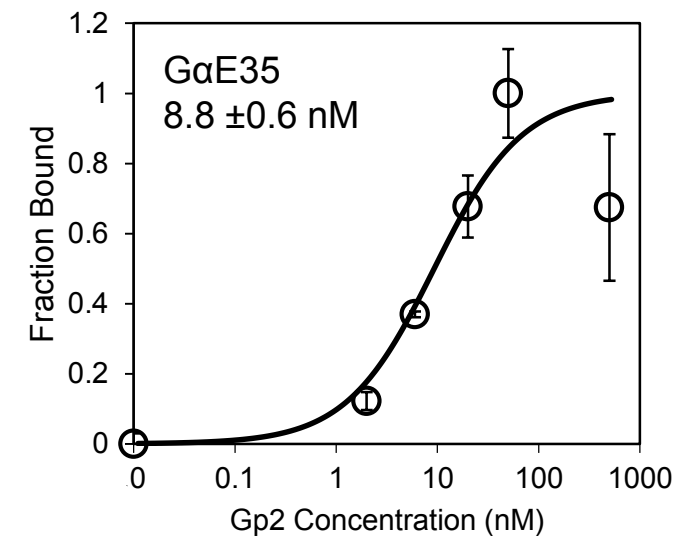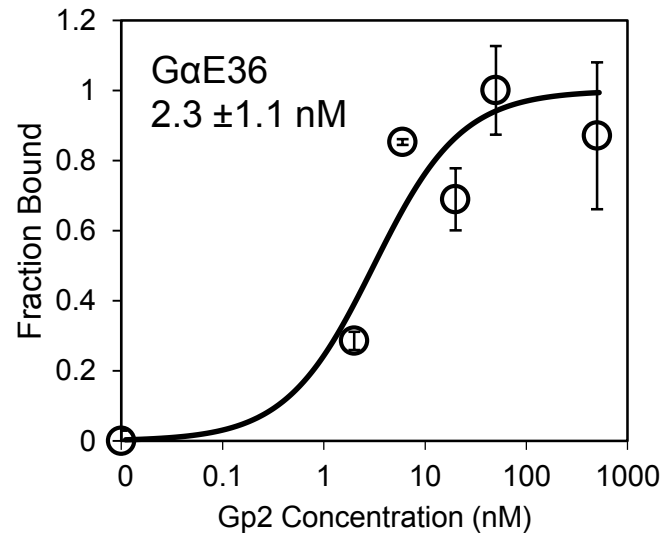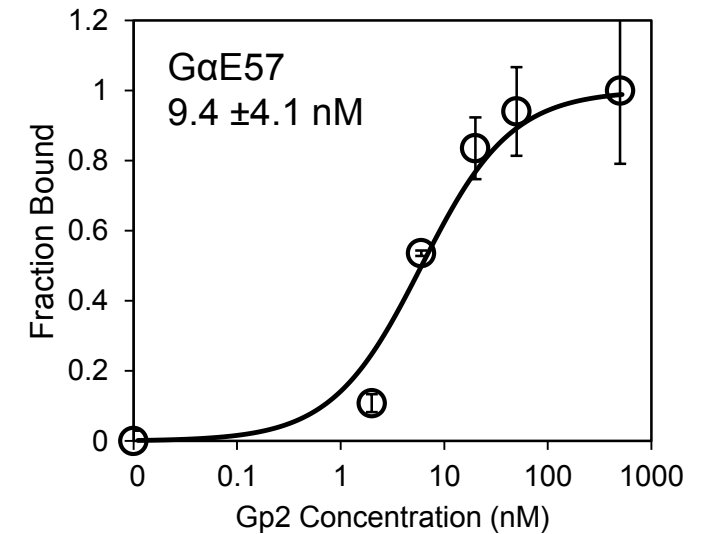

**Figure S2.** Anti-EGFR Gp2 Affinity titrations. A431 cells were incubated on ice with 2, 6, 20, 50, or 500 nM Gp2 ligand followed by labeling with fluorescein-conjugated anti-His<sub>6</sub> antibody and median fluorescence analysis via flow cytometry. Equilibrium dissociation constants were calculated using a 1:1 binding model (n = 3).

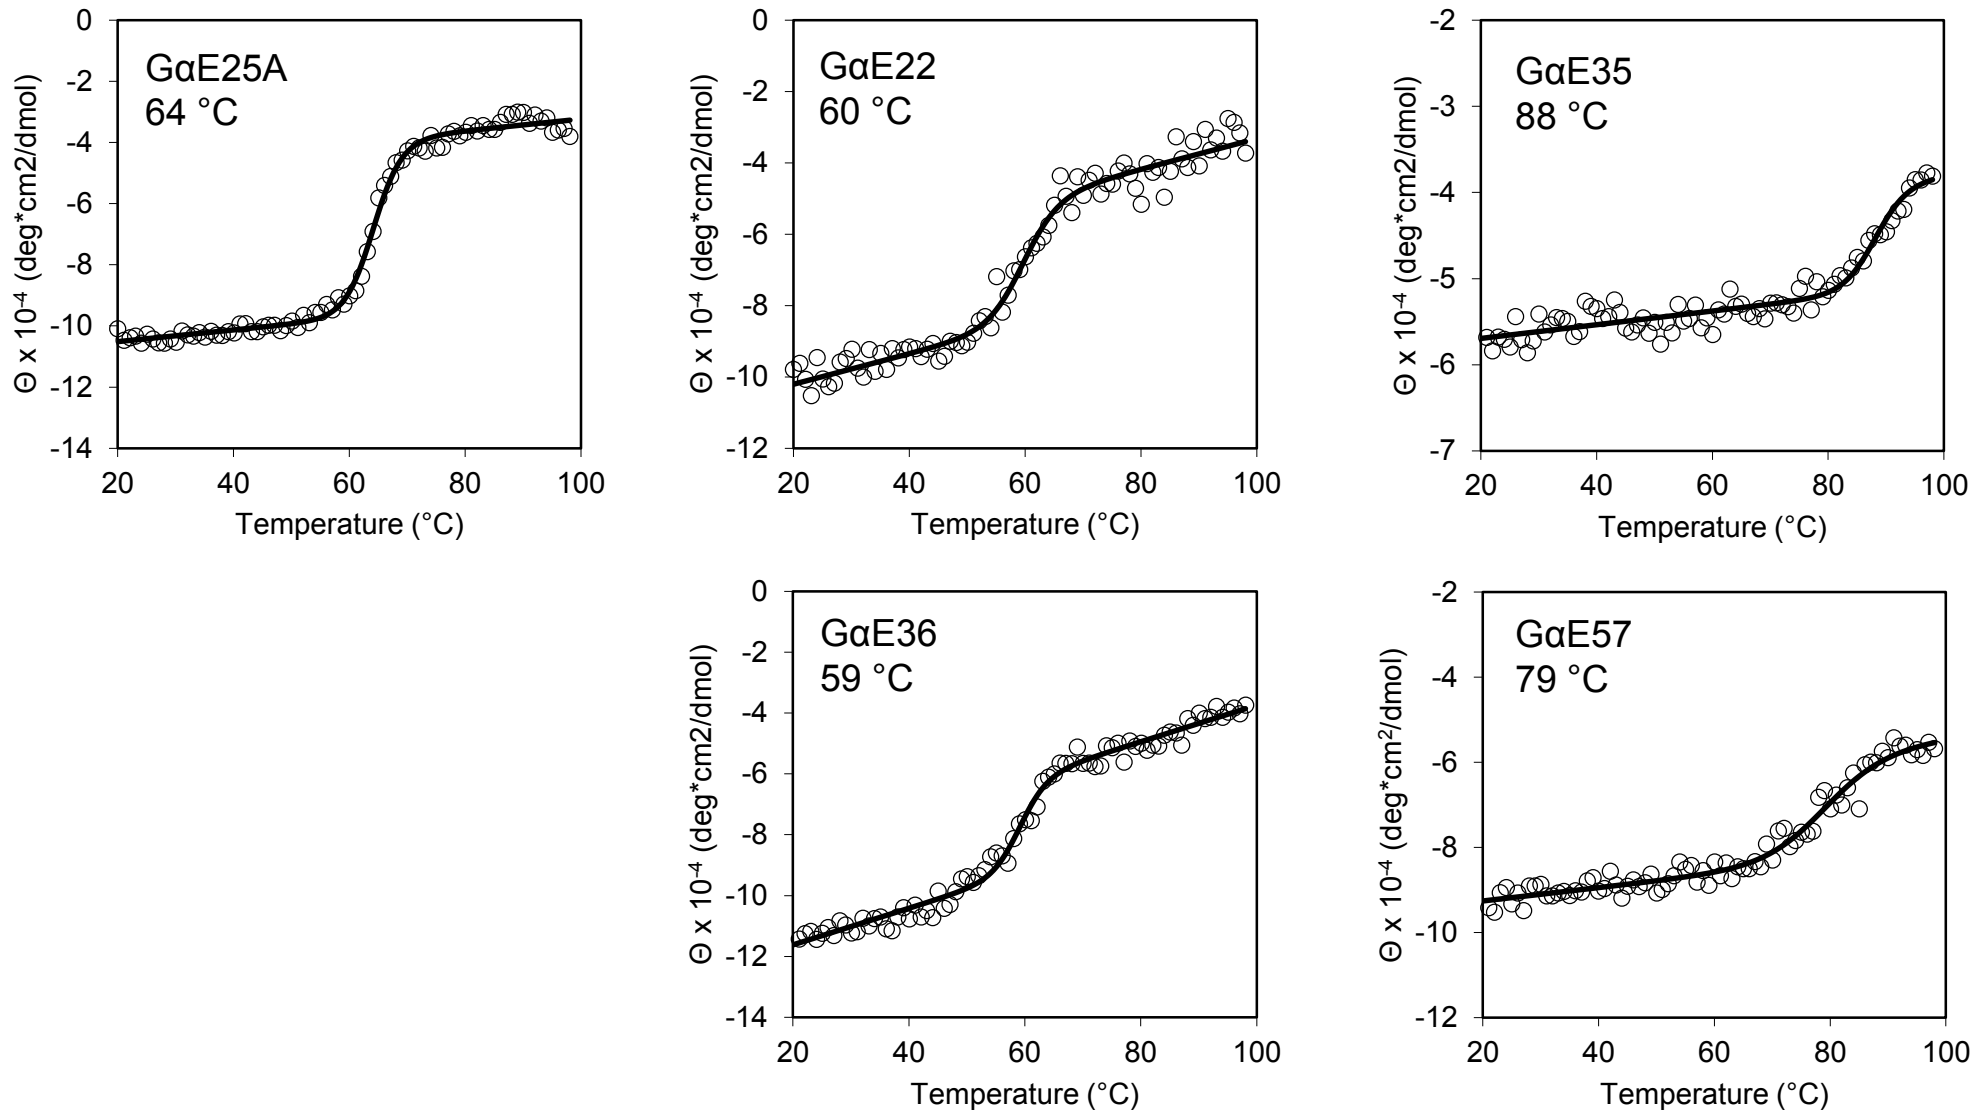

**Figure S3.** Anti-EGFR Gp2 Thermal denaturation curves. Purified ligands were scanned at a wavelength of 220 nm during heating from 20 to 98 °C (2 °C/min). The midpoint of denaturation ( $T_m$ ) was determined using a two-state protein unfolding model.

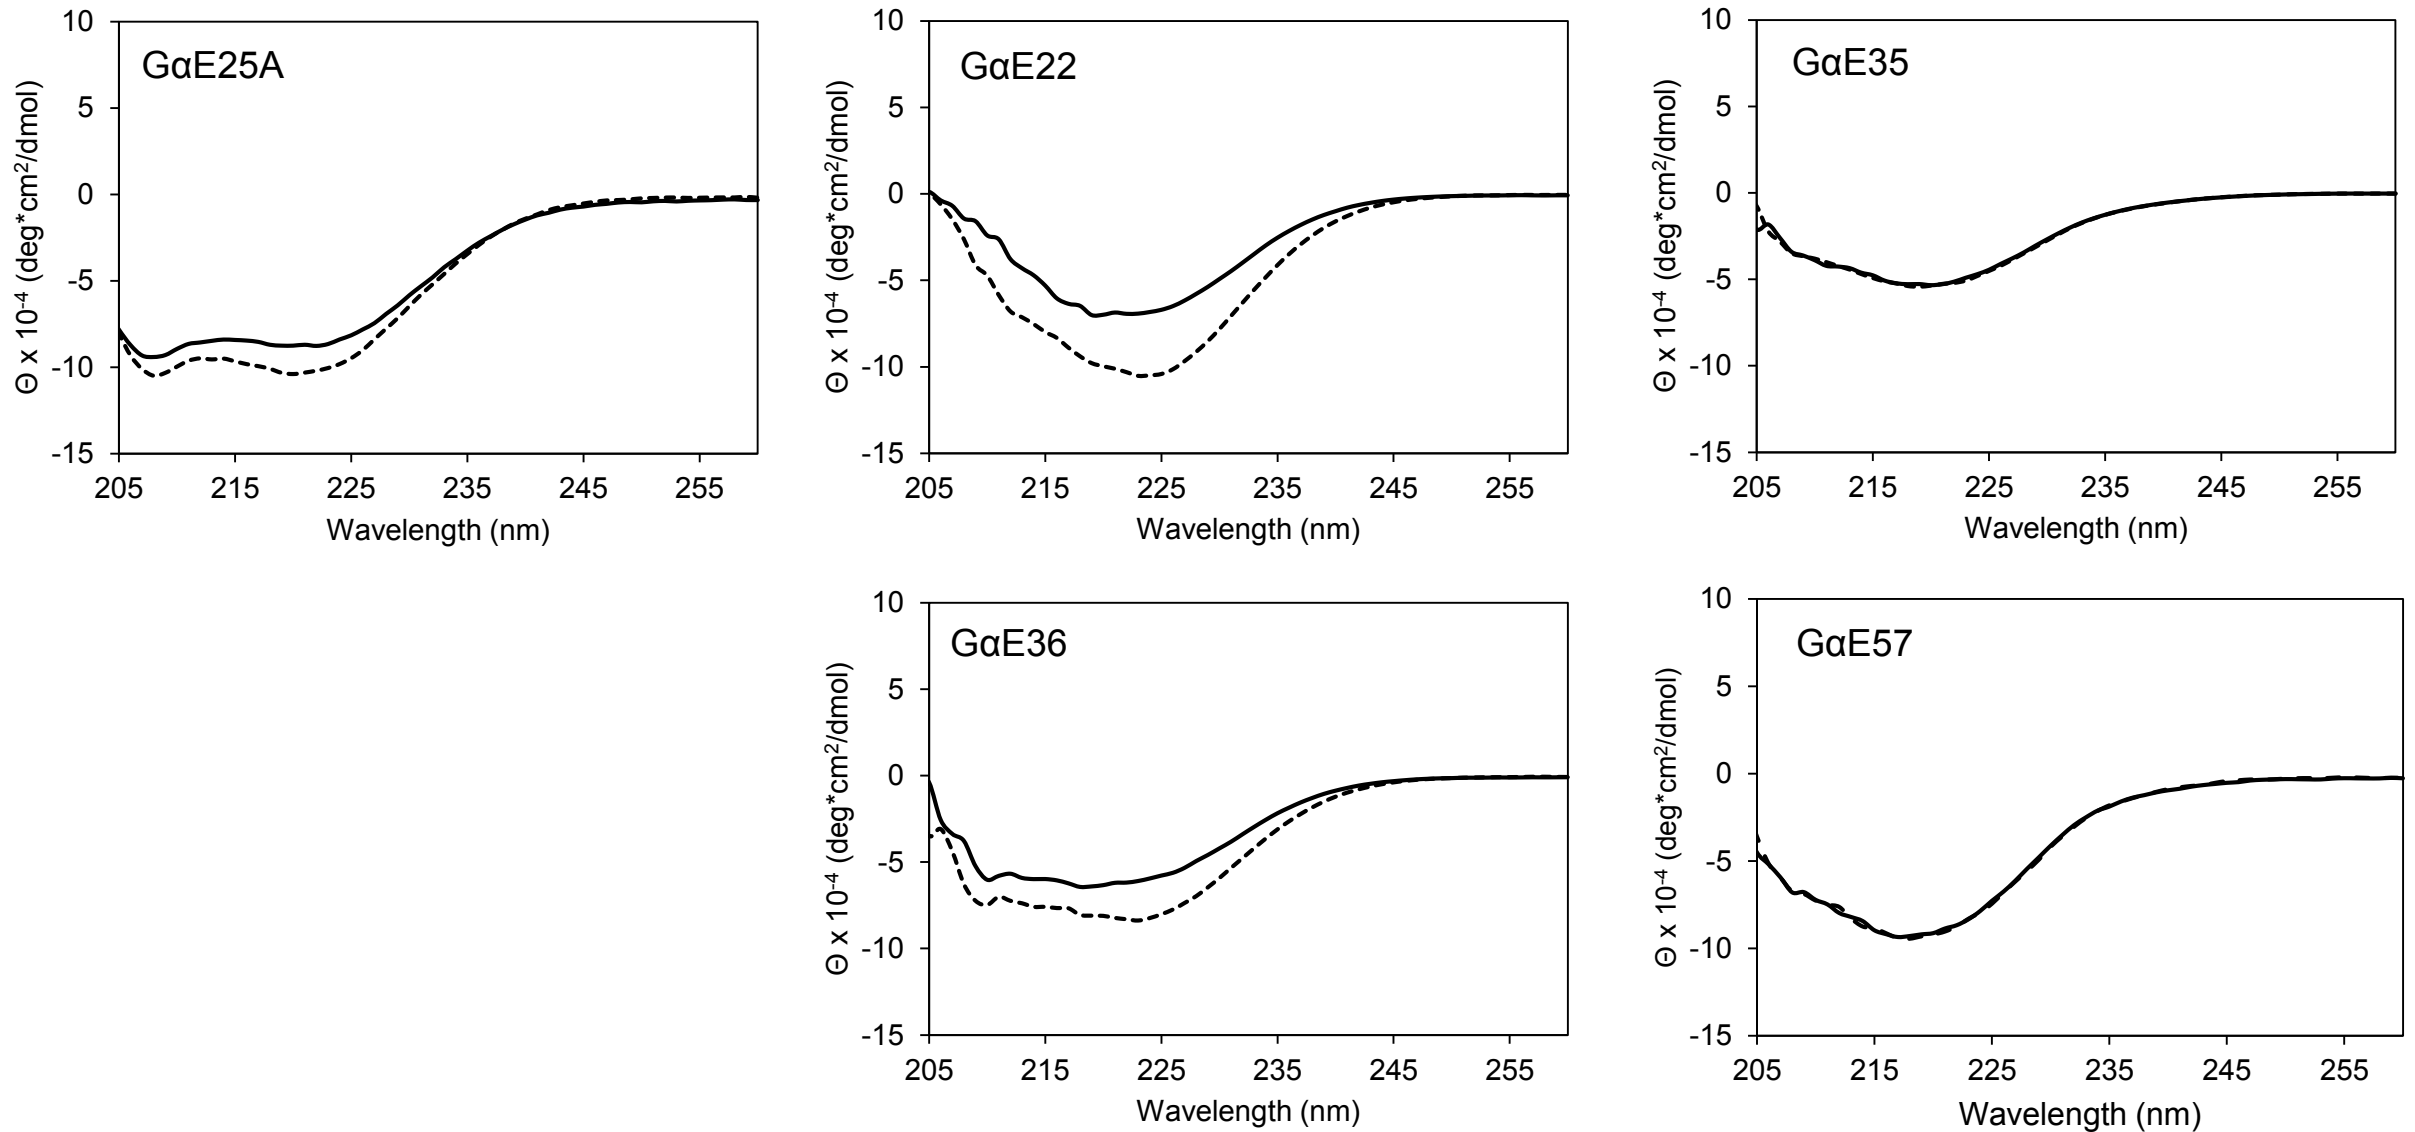

**Figure S4.** Circular dichroism spectroscopy of recovered mutants. Purified anti-EGFR Gp2 mutants were analyzed by circular dichroism spectroscopy in triplicate between 205 and 260 nm wavelengths before (---) and after (—) thermal denaturation and cooling.

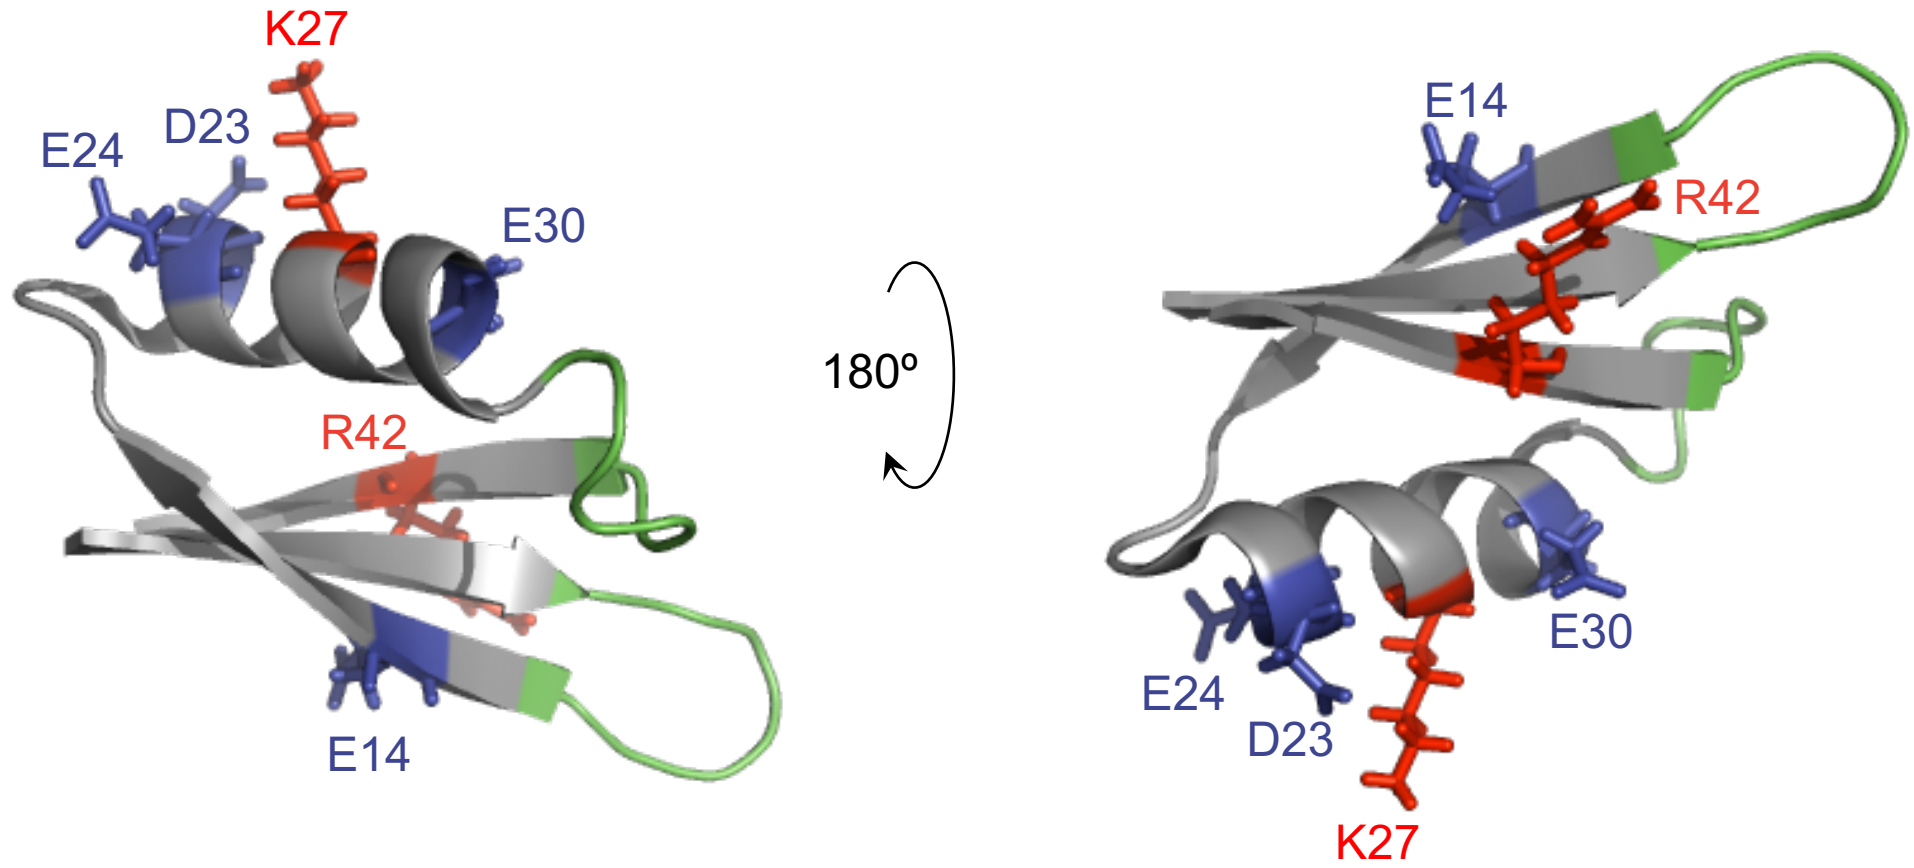

1 10 20 30 40  
GαE35: L F W A T V S R G D • S Y W F E V P V Y A Q T L D E A L K L A E T Q Y P M Y H • I Y Y V T R V P P

**Figure S5.** (A) Approximate structure, based on PDB: 2WNM, and sequence of the GαE35 ligand with acidic (blue), basic (red), and paratope (green) residues highlighted.

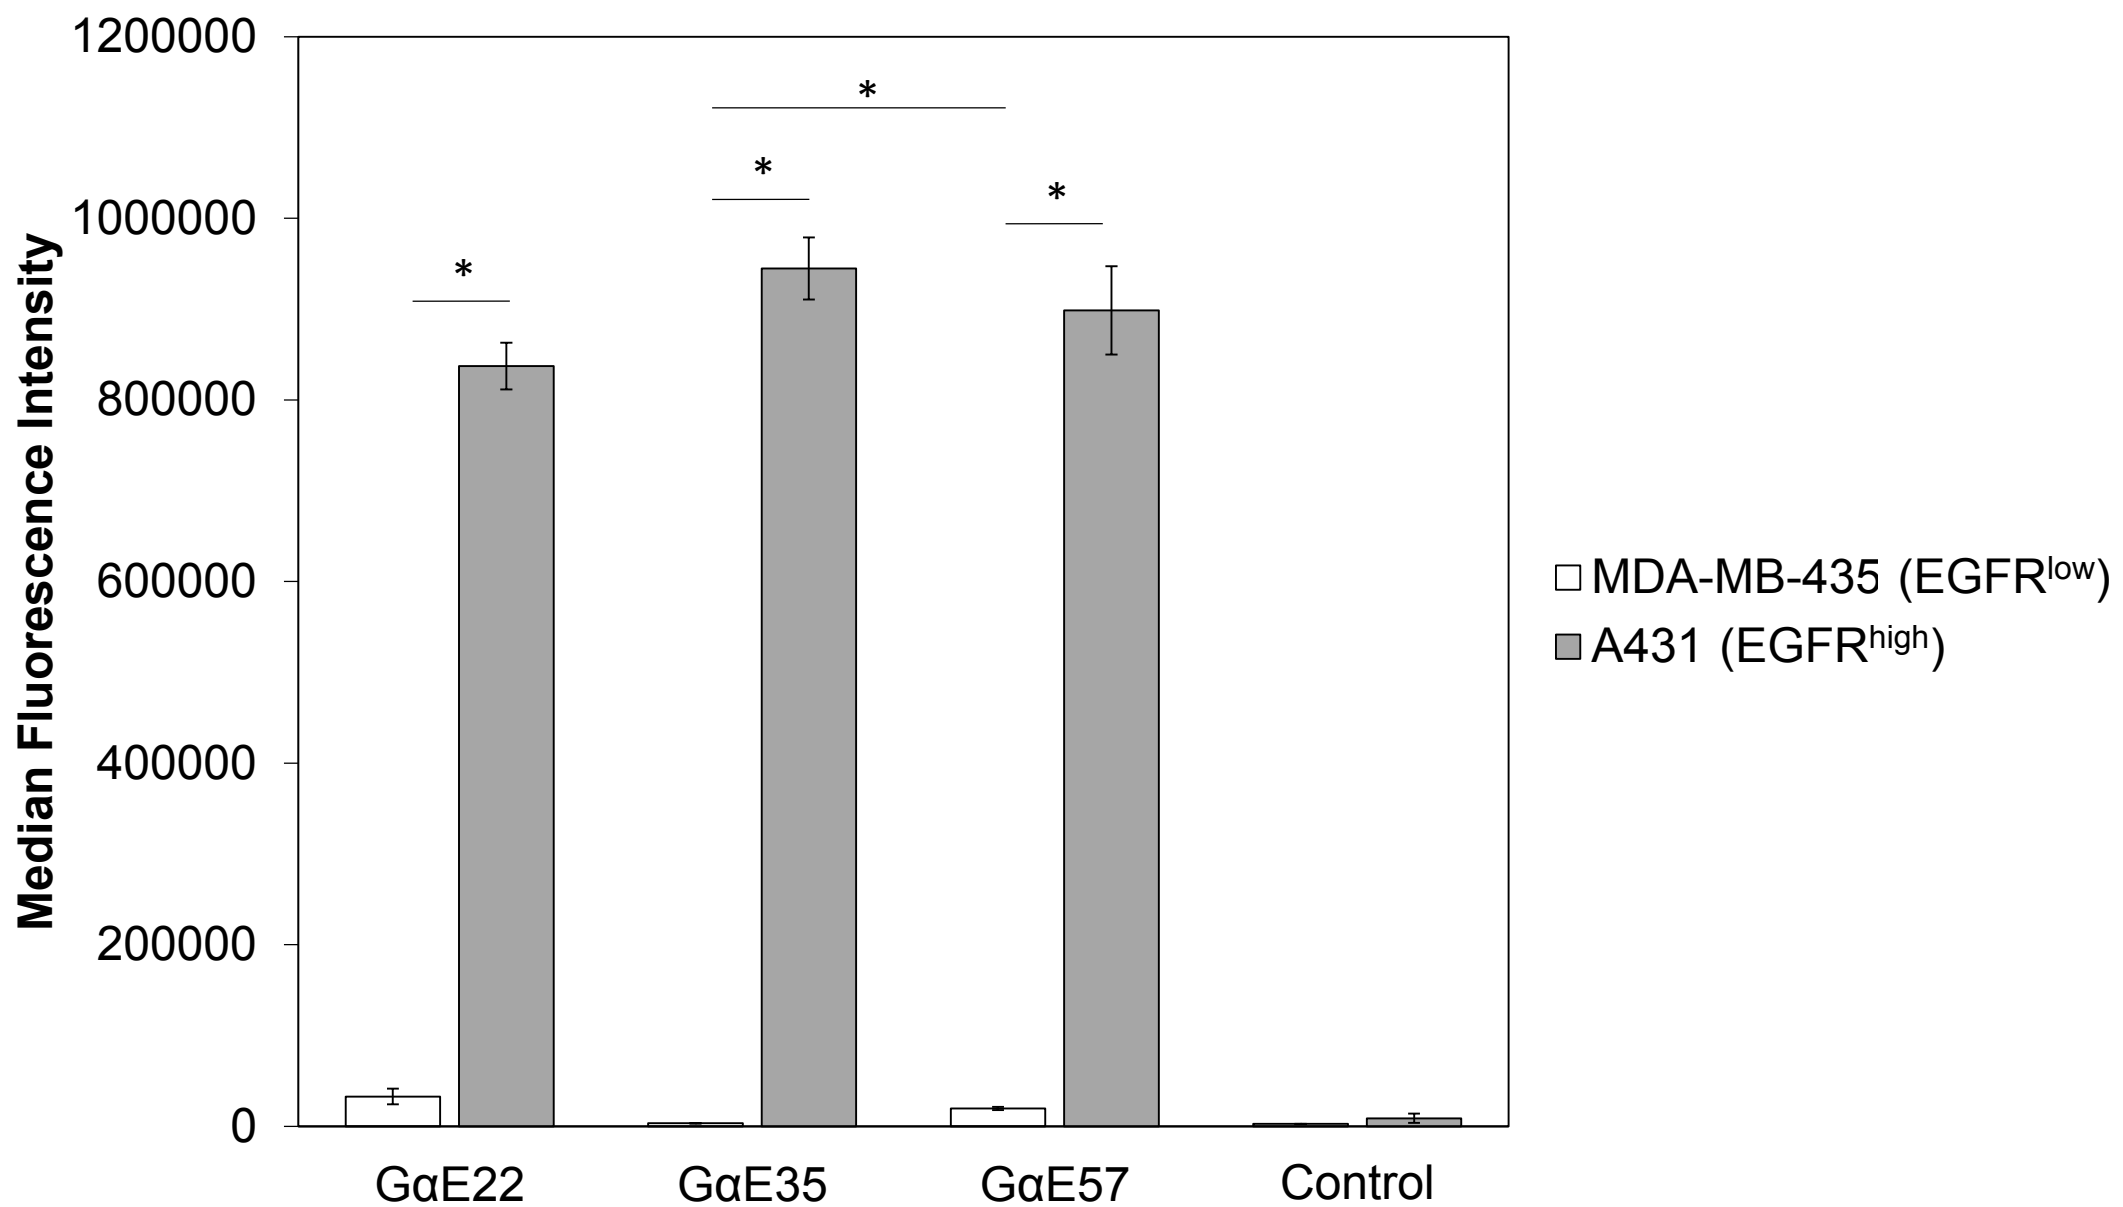

**Figure S6.** EGFR binding specificity. MDA-MB-435 (EGFR<sup>low</sup>) and A431 (EGFR<sup>high</sup>) cells were incubated on ice with 500 nM Gp2 ligand, labeled with fluorescein-conjugated anti-His<sub>6</sub> antibody, and median fluorescence signal determined with flow cytometry (n = 3) (\* signifies p ≤ 0.001).

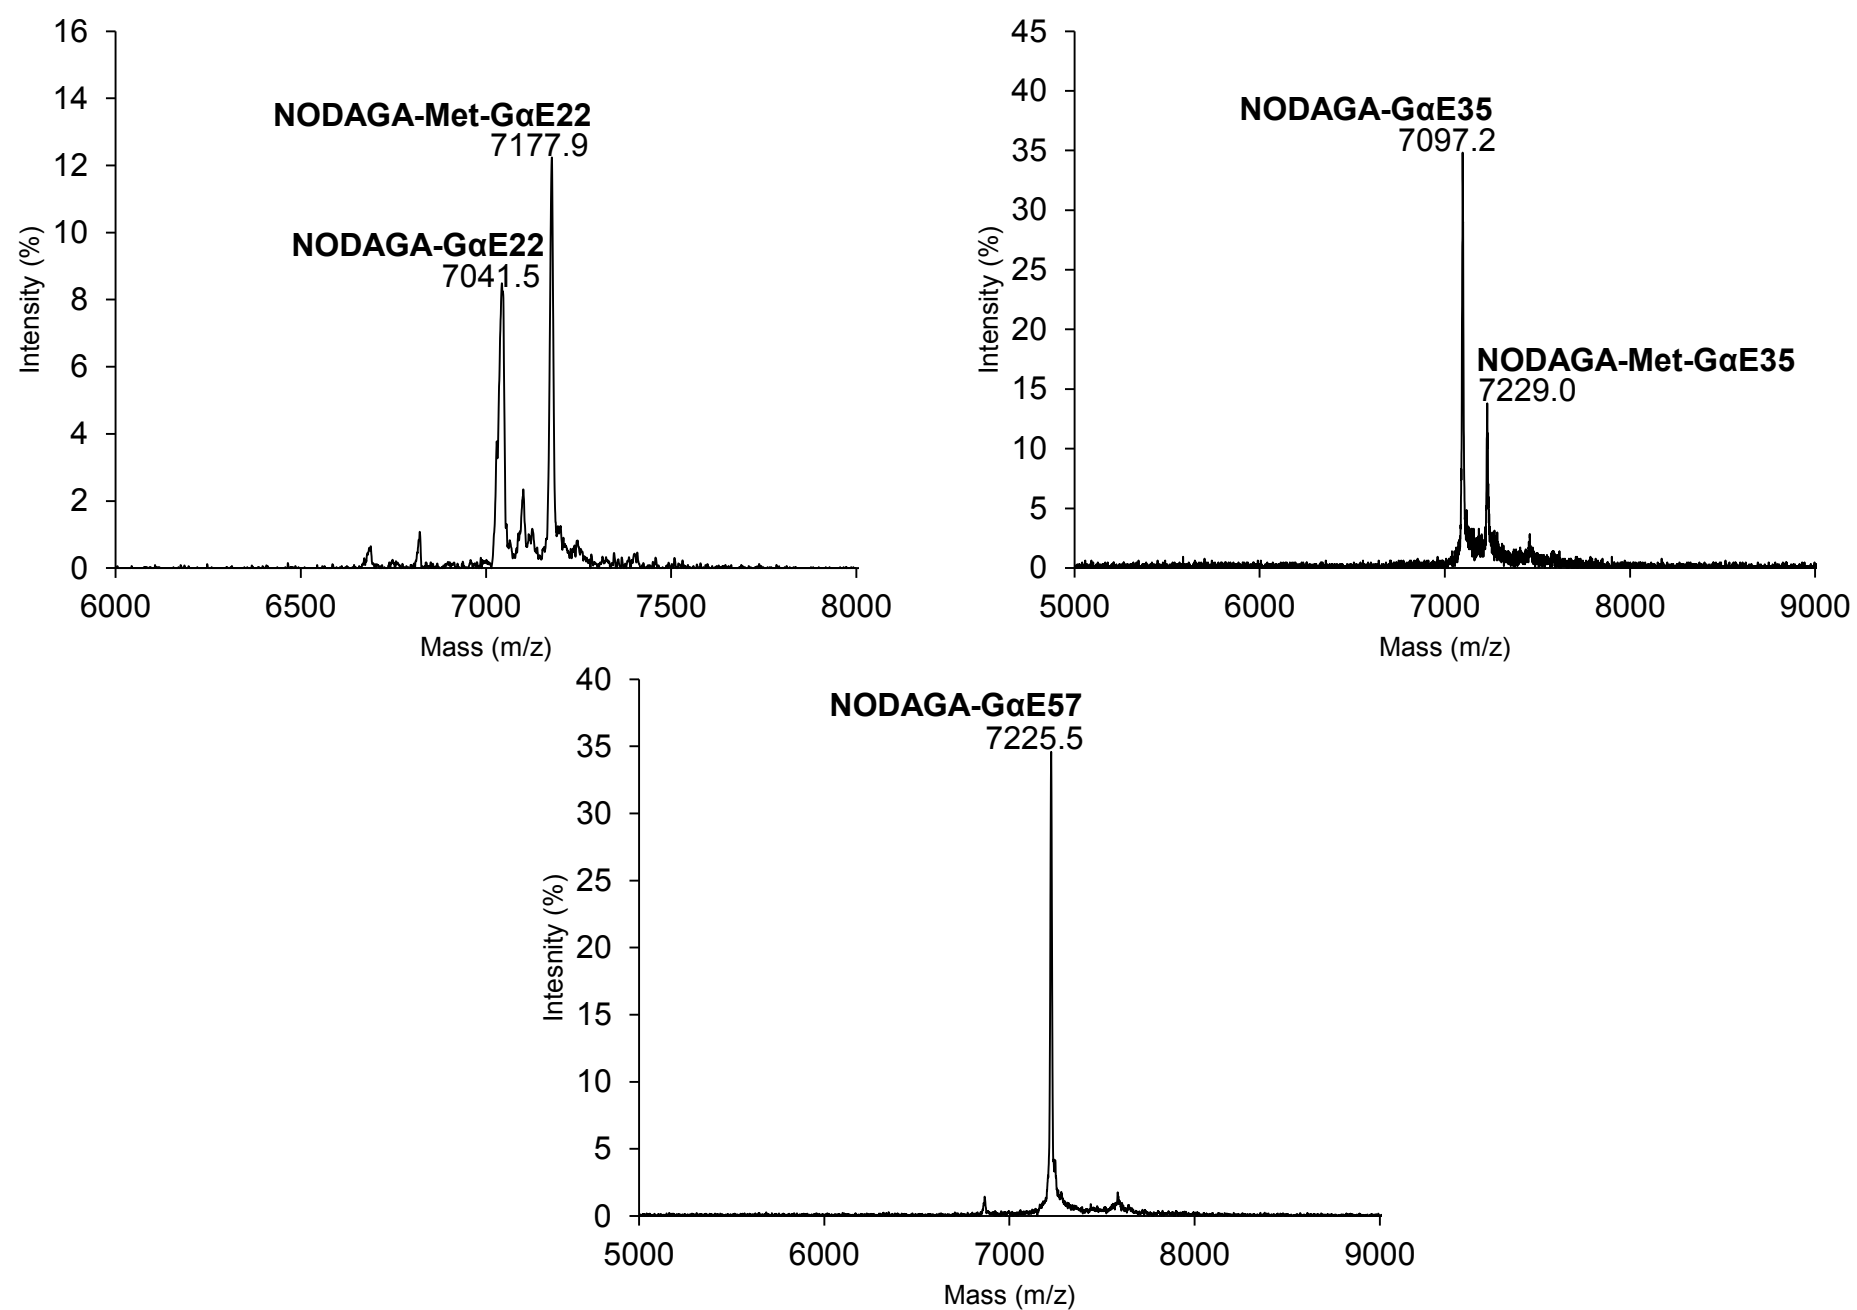

**Figure S7.** Matrix-assisted laser desorption ionization mass spectrometry (MALDI-MS) of NODAGA-conjugated GαE22, GαE23, and GαE57.

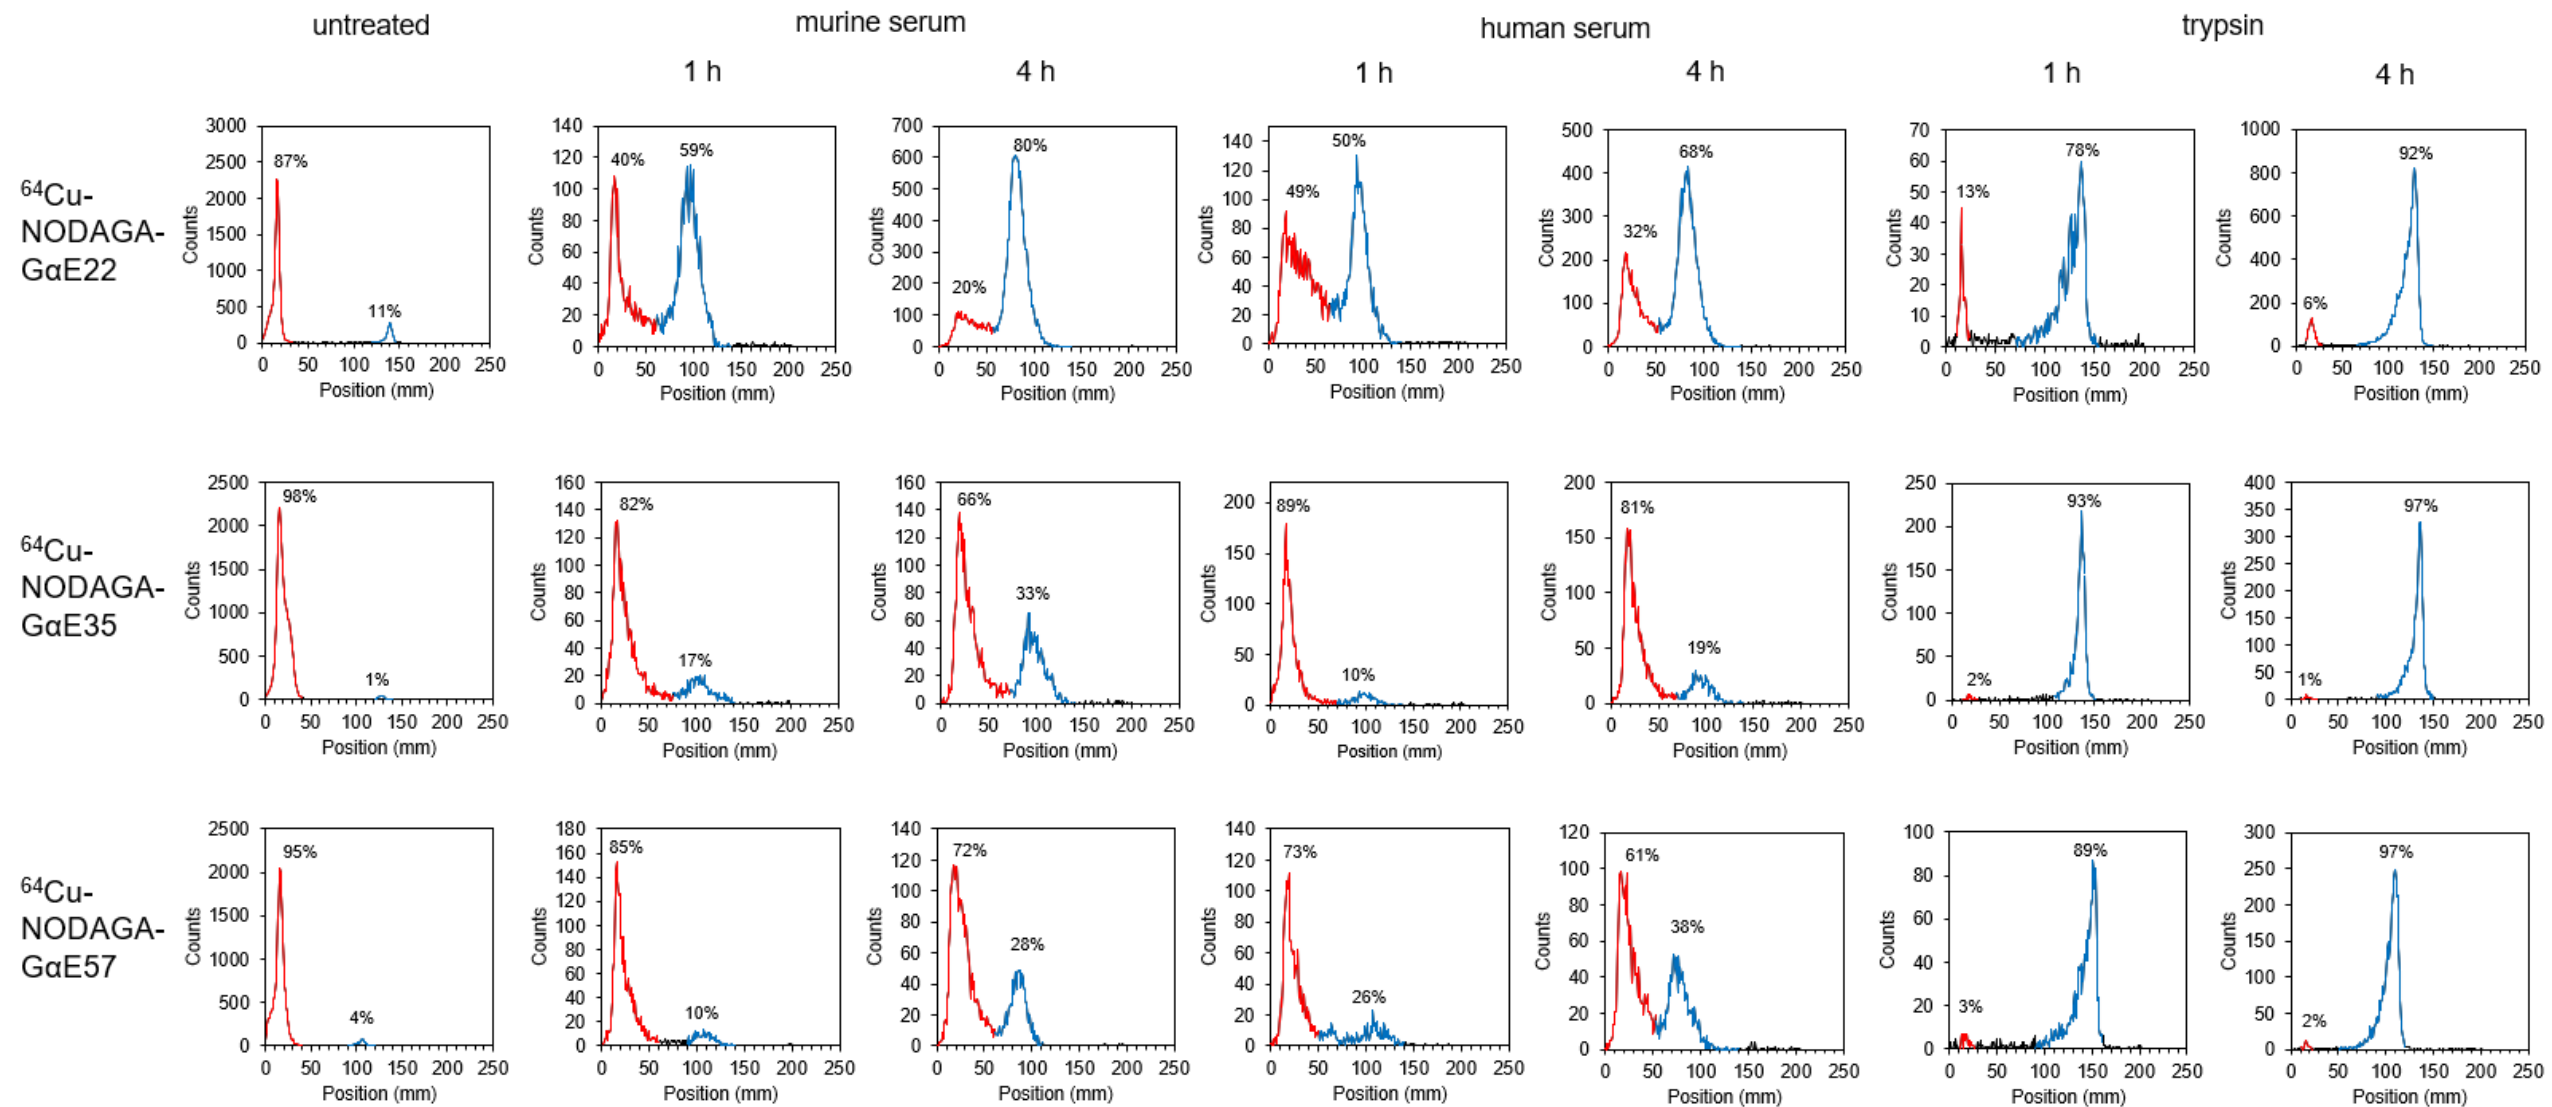

**Figure S8.** Radio-thin-layer chromatography of radiolabeled GαE clones left untreated, in serum, or trypsin.
